# Supplementary material for: Al-MOF-derived spindle-like hierarchical porous activated carbon for advanced supercapacitors
Source: Royal Society of Chemistry journal article supplement (doi:10.1039/d1dt03395f), 2022-01-01
Supplement: d1dt03395f1.pdf [file d1dt03395f1.pdf]

## Supplementary Information

### **Al-MOF-derived spindle-like hierarchical porous activated carbon for advanced supercapacitors**

Xingyu Liu<sup>†,1</sup>, Xiaoyue Wang<sup>†,1</sup>, Rui Miao<sup>†</sup>, Yanzhi Sun<sup>†,\*</sup>, Yongmei Chen<sup>†</sup>, Yang Tang<sup>†</sup>, Pingyu Wan<sup>†</sup>, Junqing Pan<sup>‡</sup>

<sup>†</sup>National Fundamental Research Laboratory of New Hazardous Chemicals Assessment and Accident Analysis, Institute of Applied Electrochemistry, Beijing University of Chemical Technology, Beijing 100029, China

<sup>‡</sup>State Key Laboratory of Chemical Resource Engineering, Beijing University of Chemical Technology, Beijing 100029, China

<sup>1</sup>These authors contributed to the work equally.

\*E-mails: sunyz@mail.buct.edu.cn (Y. Sun);

Tel./Fax: 8610-64435452

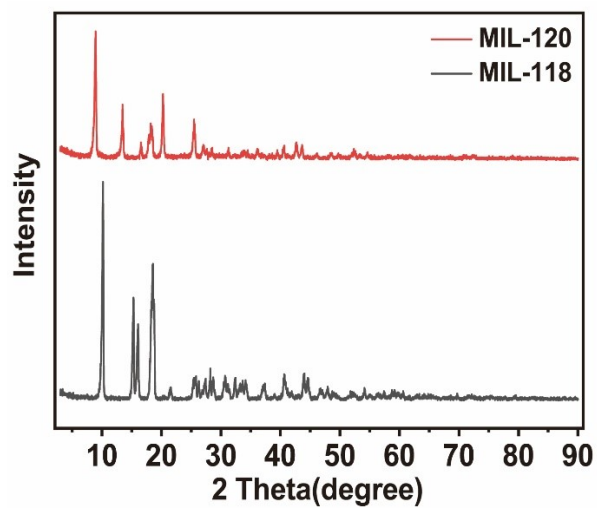

**Fig. S1.** XRD patterns of MIL-118 and MIL-120

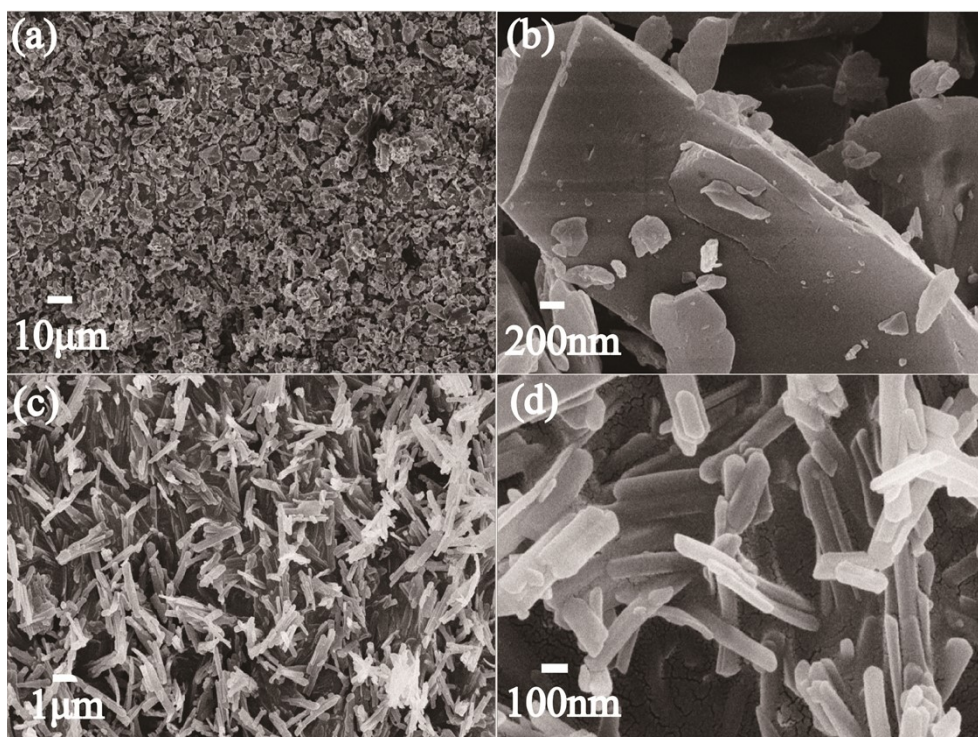

**Fig. S2.** SEM images of (a,b) MIL-118, (c,d) MIL-120

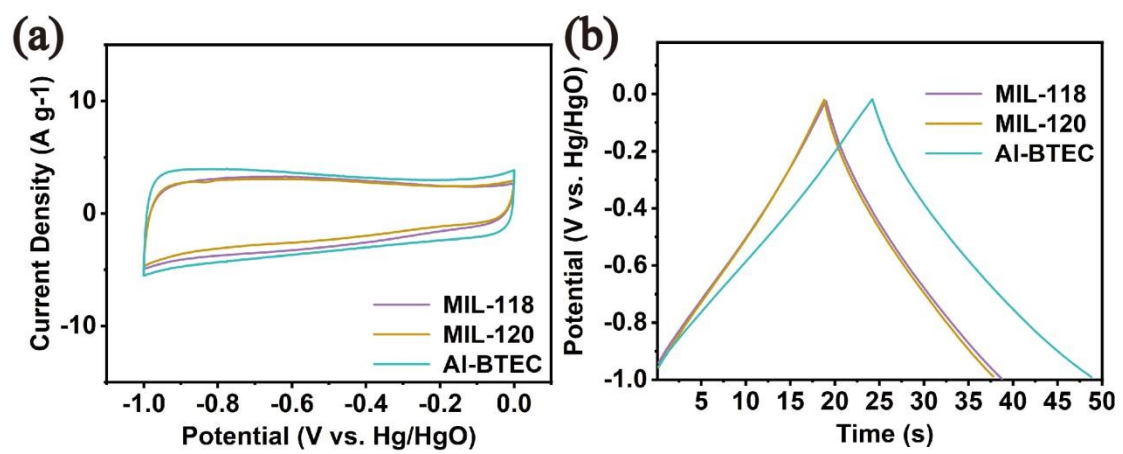

**Fig. S3.** (a) Comparison of CV curves for different materials at scan rates of  $10 \text{ mV s}^{-1}$ , (b) Comparison of GCD curves for different materials under  $10 \text{ A g}^{-1}$

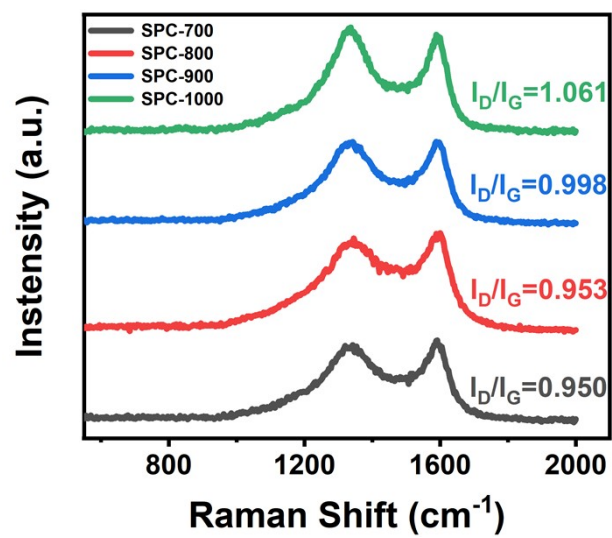

**Fig. S4.** Raman spectra of SPC at different carbonization temperatures.

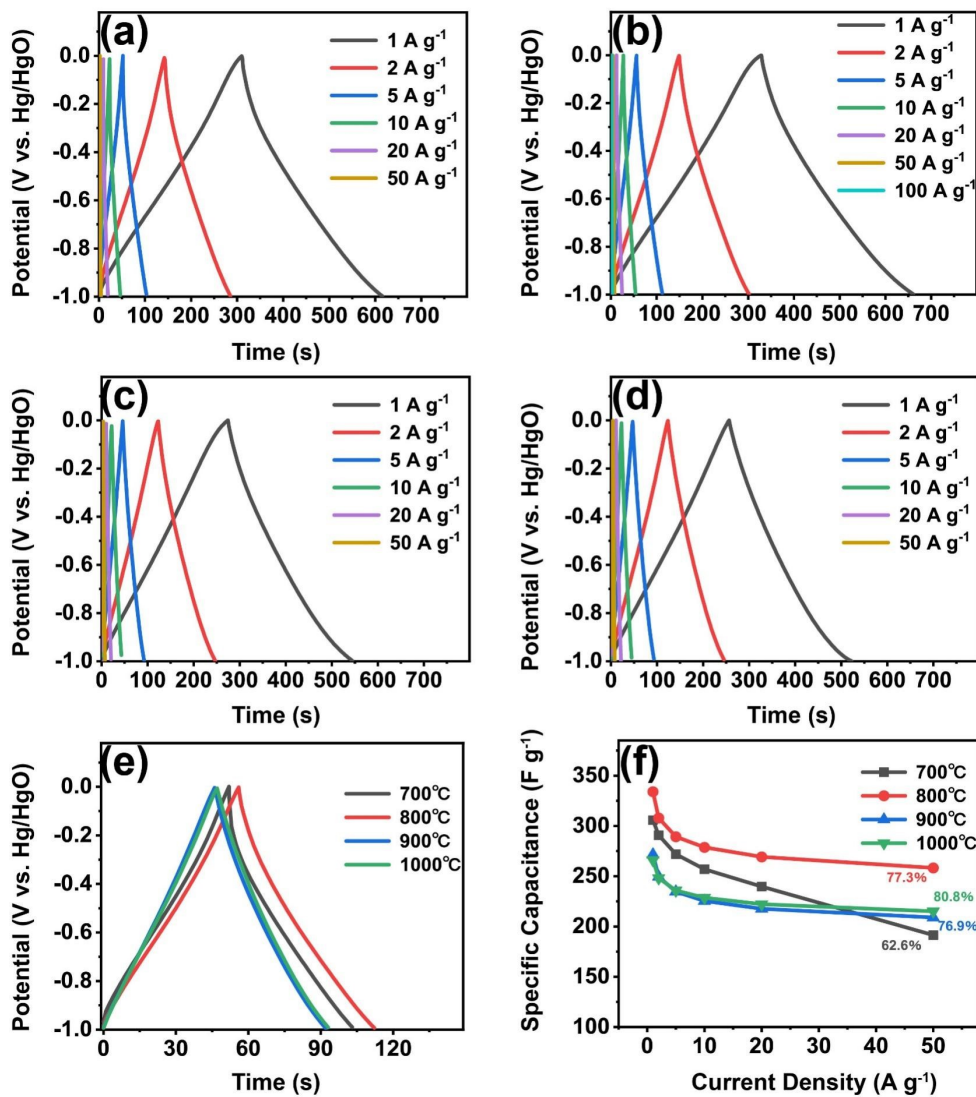

**Fig. S5.** The influence of different carbonization temperatures on the electrochemical performance of RPC (a) 700°C, (b) 800°C, (c) 900°C, (d) 1000°C, (e) RPC at different carbonization temperatures at 5 A g<sup>-1</sup>, (f) Comparison of RPC discharge specific capacitances at different carbonization temperatures

**Table S1** Comparison of porosity of Al-BTEC, Al@C and SPC.

|         | BET                             | Mico-BET                        | Meco-BET                         | Pore volume                       | Pore size |
|---------|---------------------------------|---------------------------------|----------------------------------|-----------------------------------|-----------|
|         | /m <sup>2</sup> g <sup>-1</sup> | /m <sup>2</sup> g <sup>-1</sup> | / m <sup>2</sup> g <sup>-1</sup> | / cm <sup>3</sup> g <sup>-1</sup> | /nm       |
| Al-BTEC | 728                             | 621                             | 106                              | 0.23                              | 2.8       |
| Al@C    | 28                              | 11                              | 17                               | 0.08                              | 1.3       |
| SPC     | 1895                            | 1548                            | 346                              | 0.68                              | 2.4       |
